# Supplementary material for: The Cross-Modal Suppressive Role of Visual Context on Speech Intelligibility: An ERP Study
Source: PubMed Central journal article supplement (PMC7692090; doi:10.3390/brainsci10110810), 2020-11-02
Supplement: brainsci-10-00810-s001.pdf [file brainsci-10-00810-s001.pdf]

| Animate Words | Inanimate words |
|---------------|-----------------|
| Ant           | Axe             |
| Bear          | Bag             |
| Bee           | Bike            |
| Boar          | Boat            |
| Cat           | Book            |
| Cow           | Box             |
| Crab          | Bus             |
| Crow          | Car             |
| Deer          | Chair           |
| Dog           | Chalk           |
| Eel           | Comb            |
| Fish          | Couch           |
| Fly           | Cup             |
| Fox           | Desk            |
| Frog          | Door            |
| Goat          | Fork            |
| Goose         | Frame           |
| Horse         | Glass           |
| Lamb          | Hat             |
| Lynx          | Jar             |
| Moth          | Key             |
| Owl           | Kite            |
| Pig           | Lock            |
| Prawn         | Pan             |
| Quail         | Pants           |
| Rat           | Pin             |
| Shark         | Plate           |
| Sheep         | Purse           |
| Shrew         | Rail            |
| Shrimp        | Ring            |
| Skunk         | Rock            |
| Snail         | Shelf           |
| Snake         | Shirt           |
| Squid         | Spoon           |
| Swan          | Stone           |
| Toad          | String          |
| Wasp          | Tile            |
| Whale         | Truck           |
| Wolf          | Watch           |
| Yak           | Wheel           |

**Table 1:** Words used
